# Supplementary material for: Amino Acid Polymorphisms on the Brazilian Strain of Yellow Fever Virus Methyltransferase Are Related to the Host’s Immune Evasion Mediated by Type I Interferon
Source: MDPI journal article supplement (doi:10.3390/v15010191), 2023-01-10
Supplement: s1 [file s1]

**TableS 1** - Oligonucleotide sequences for the infectious clone methodology and site-directed mutagenesis

|                            | Forward Primer |                                                                           | Reverse Primer |                                                                       | Purpose                                                     |
|----------------------------|----------------|---------------------------------------------------------------------------|----------------|-----------------------------------------------------------------------|-------------------------------------------------------------|
|                            | ID             | Sequence (5' --> 3')                                                      | ID             | Sequence (5' --> 3')                                                  |                                                             |
| Cloning steps              | 1(+)           | CGCCTGGTATCTTTATAGTCCTGTCGG GTTTCGC                                       | 1(-)           | CCAAATGTGTTTATTGCCTAGCAA CTCGATTTGCAGACC                              | Merge the SP6 transcription promoter to fragment 1          |
|                            | ICYFSP6        | ATTTAGGTGACACTATAGAGTAAATC CTGTGTGCTAATTGAGGTGCATTGG                      | 2.1(-)         | TTGACCTCGGCATGAACATGTCAC TCTCTTCAA                                    | Obtain fragment 1                                           |
|                            | 3(+)           | GAATGGAAGCTTCATCATCGATGGGA AGTCCAGGAAA                                    | 3(-)           | GAGAAAGGCCCCACGCGTGACGTG C                                            | Obtain fragment 2                                           |
|                            | 4(+)           | GCACGTCACGCGTGGGGCCTTTCTC                                                 | 4(-)           | TCTCAATTTTGCGGTACCTCTCGAG ACGGCC                                      | Obtain fragment 3                                           |
|                            | 5(+)           | GGCCGTCTCGAGAGGTACCGCAAAT TGAGA                                           | 5(-)           | GAGCCAGACGGACTAGTGGTTTTG TGTTTGTCATCC                                 | Obtain fragment 4                                           |
|                            | MCS2(+)        | GGCCGCCATATGATCGATGCGCGCGA ATTCACGCGTGACGTCGGTACCGGCG CCGTGCACACTAGTATGCA | MCS2(-)        | TACTAGTGTGCACGGCGCCGGTAC CGACGTCACGCGTGAATTCGCGCG CATCGATCATATGGC     | MCS of pCC1-4K                                              |
|                            | MCS3(+)        | GGCCGCCATATGATCGATGCGCGCGA ATTCACGCGTGACGTCGGTACCGGCG CCGTGCACACTAGTC     | MCS3(-)        | TCGAGACTAGTGTGCACGGCGCCG GTACCGACGTCACGCGTGAATTCG CGCGCATCGATCATATGGC | MCS of pBR322                                               |
| Template cDNA regeneration | Mlu(+)         | TTCACGCGTGACGTCGGTACCGCAA AATTG                                           | Mlu(-)         | ACGCGTGAATTCCCACTCTGTTT GAGAAC                                        | Primer set 1 - Amplification of the entire pCC1+1.4 plasmid |
|                            | 2.3(+)         | CGCGCGAATTCCTTCCAGATAGAAGA GTTT                                           | 2.3(-)         | TTTTCCCAGTCACGACGTTGTAAA ACGACG                                       | Primer set 2 - Amplification of fragment 2.3                |
|                            | ICYFSP6        | ATTTAGGTGACACTATAGAGTAAATC CTGTGTGCTAATTGAGGTGCATTGG                      | YFmelt65Rnew   | AGTGGTTTTGTGTTTTTCGTCCAA AGGTCTGCTTATTCTTGAGC                         | Primer set 3 - Final template cDNA amplification            |
| Site-directed mutagenesis  | NS5_R101K(+)   | GAGAAGTGAGTGGGGTCAAGGGATT CACCCTT                                         | NS5_R101K(-)   | AAGGGTGAATCCCTTGACCCCACT CACTTCTC                                     | Mutagenesis in 101                                          |
|                            | NS5_I138V(+)   | CCATCGCCTTGAGCCGGTAAAGTGTG ATACCCT                                        | NS5_I138V(-)   | AGGGTATCACACTTTACCGGCTCA AGGCGATGG                                    | Mutagenesis in 138                                          |
|                            | NS5_S173G(+)   | CTGTTGAGAAATGGTTGGGCTGTGGT GTTGAAAGC                                      | NS5_S173G(-)   | GCTTTCAACACCACAGCCCAACCA TTTCTCAACAG                                  | Mutagenesis in 173                                          |
